# Supplementary material
Source: Springer Nature journal article supplement (https://www.springermedizin.de/resource/supplementary/13002_2009_165_MOESM8_ESM.pdf/9627296)

**A**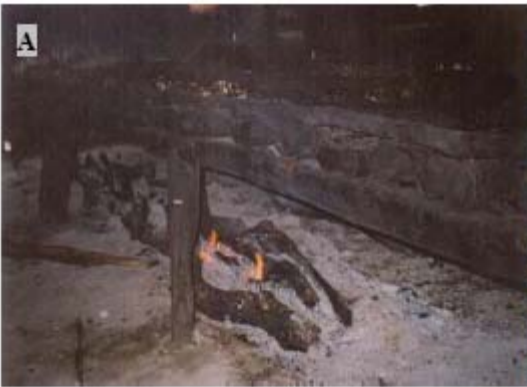**B**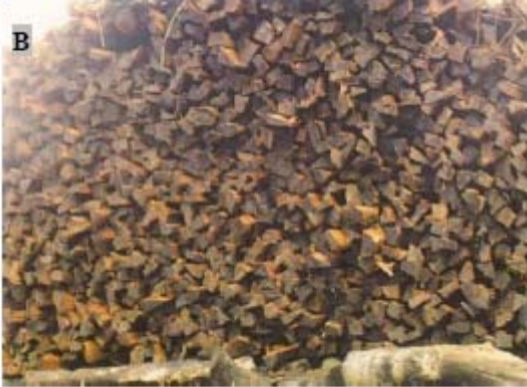

Supplement: MOESM8 [file 9627296]
